# Supplementary material
Source: HighWire-hosted journal article supplement (https://oem.bmj.com/content/78/6/426)
Supplement: inline-supplementary-material-1 [file inline-supplementary-material-1.pdf]

## Online Supplemental Material

**Table 1. Characteristics of the study population by educational background<sup>a</sup> in those who had worked at initiation of infertility treatment and felt that infertility treatment was incompatible with work**

| Items                                                            | Categories                        | Educational background <sup>a</sup> |            |            | P value <sup>f</sup> |
|------------------------------------------------------------------|-----------------------------------|-------------------------------------|------------|------------|----------------------|
|                                                                  |                                   | Total                               | Higher     | Lower      |                      |
| Age [years] <sup>b</sup>                                         |                                   |                                     |            |            |                      |
|                                                                  | <38.0                             | 503 (47.6)                          | 298 (52.3) | 205 (42.2) | < .01                |
|                                                                  | ≥38.0                             | 553 (52.4)                          | 272 (47.7) | 281 (57.8) |                      |
| Age at marriage [years] <sup>b</sup>                             |                                   |                                     |            |            |                      |
|                                                                  | <32.0                             | 458 (49.0)                          | 257 (50.8) | 201 (46.9) | .23                  |
|                                                                  | ≥32.0                             | 477 (51.0)                          | 249 (49.2) | 228 (53.1) |                      |
| Age at initiation of ART [years] <sup>b</sup>                    |                                   |                                     |            |            |                      |
|                                                                  | <37.0                             | 335 (46.4)                          | 195 (50.8) | 140 (41.4) | .01                  |
|                                                                  | ≥37.0                             | 387 (53.6)                          | 189 (49.2) | 198 (58.6) |                      |
| Duration of infertility [years] <sup>b</sup>                     |                                   |                                     |            |            |                      |
|                                                                  | <2.0                              | 309 (30.6)                          | 190 (34.7) | 119 (25.6) | < .01                |
|                                                                  | ≥2.0                              | 702 (69.4)                          | 357 (65.3) | 345 (74.4) |                      |
| Infertility treatment cost [JPY] <sup>b,c</sup>                  |                                   |                                     |            |            |                      |
|                                                                  | <3.0 million (21,500 GBP)         | 873 (83.1)                          | 488 (85.9) | 385 (79.9) | < .01                |
|                                                                  | ≥3.0 million                      | 177 (16.9)                          | 80 (14.1)  | 97 (20.1)  |                      |
| Annual salary [JPY] <sup>b,c</sup>                               |                                   |                                     |            |            |                      |
|                                                                  | <4.0 million (28,700 GBP)         | 511 (56.2)                          | 211 (42.2) | 300 (73.3) | <.001                |
|                                                                  | ≥4.0 million                      | 398 (43.8)                          | 289 (57.8) | 109 (26.7) |                      |
| Partner annual salary [JPY] <sup>b,c</sup>                       |                                   |                                     |            |            |                      |
|                                                                  | <8.0 million (57,400 GBP)         | 778 (75.7)                          | 368 (65.8) | 410 (87.4) | < .001               |
|                                                                  | ≥8.0 million                      | 250 (24.3)                          | 191 (34.2) | 59 (12.6)  |                      |
| Employment type at the initiation of infertility treatment       |                                   |                                     |            |            |                      |
|                                                                  | Permanent worker <sup>d</sup>     | 497 (68.4)                          | 281 (73.9) | 216 (62.2) | < .01                |
|                                                                  | Non-permanent worker <sup>d</sup> | 117 (16.1)                          | 52 (13.7)  | 65 (18.7)  |                      |
|                                                                  | Self-employed and others          | 113 (15.5)                          | 47 (12.4)  | 66 (19.0)  |                      |
| Infertility treatment-relevant support from company <sup>e</sup> |                                   |                                     |            |            |                      |

| Items | Categories | Educational background <sup>a</sup> |            |            | <i>P</i> value <sup>f</sup> |
|-------|------------|-------------------------------------|------------|------------|-----------------------------|
|       |            | Number (%)                          |            |            |                             |
|       |            | Total                               | Higher     | Lower      |                             |
|       | Yes        | 421 (42.1)                          | 210 (38.9) | 211 (45.8) | .03                         |
|       | No         | 580 (57.9)                          | 330 (61.1) | 250 (54.2) |                             |

<sup>a</sup>: Educational background: university and graduate school as 'higher educational background'; and junior high school, high school, and junior college/technical school/university dropout as 'lower educational background'.

<sup>b</sup>: The median value.

<sup>c</sup>: Converted to British pound (GBP) from Japanese yen (JPY) using average exchange rate in August 2020: 139.3 JPY/GBP.

<sup>d</sup>: Permanent worker defined no fixed end date for their employment; non-permanent worker defined contract and part-time worker; self-employed and other worker.

<sup>e</sup>: Infertility treatment-relevant support including, but not limited to, short-time work, hours-leave and flexible working style.

<sup>f</sup>: Pearson  $\chi^2$  test.
